# Supplementary material
Source: Springer Nature journal article supplement (http://www.springermedizin.de/resource/supplementary/13018_2006_16_MOESM3_ESM.pdf/9636136)

**Gap distance change**

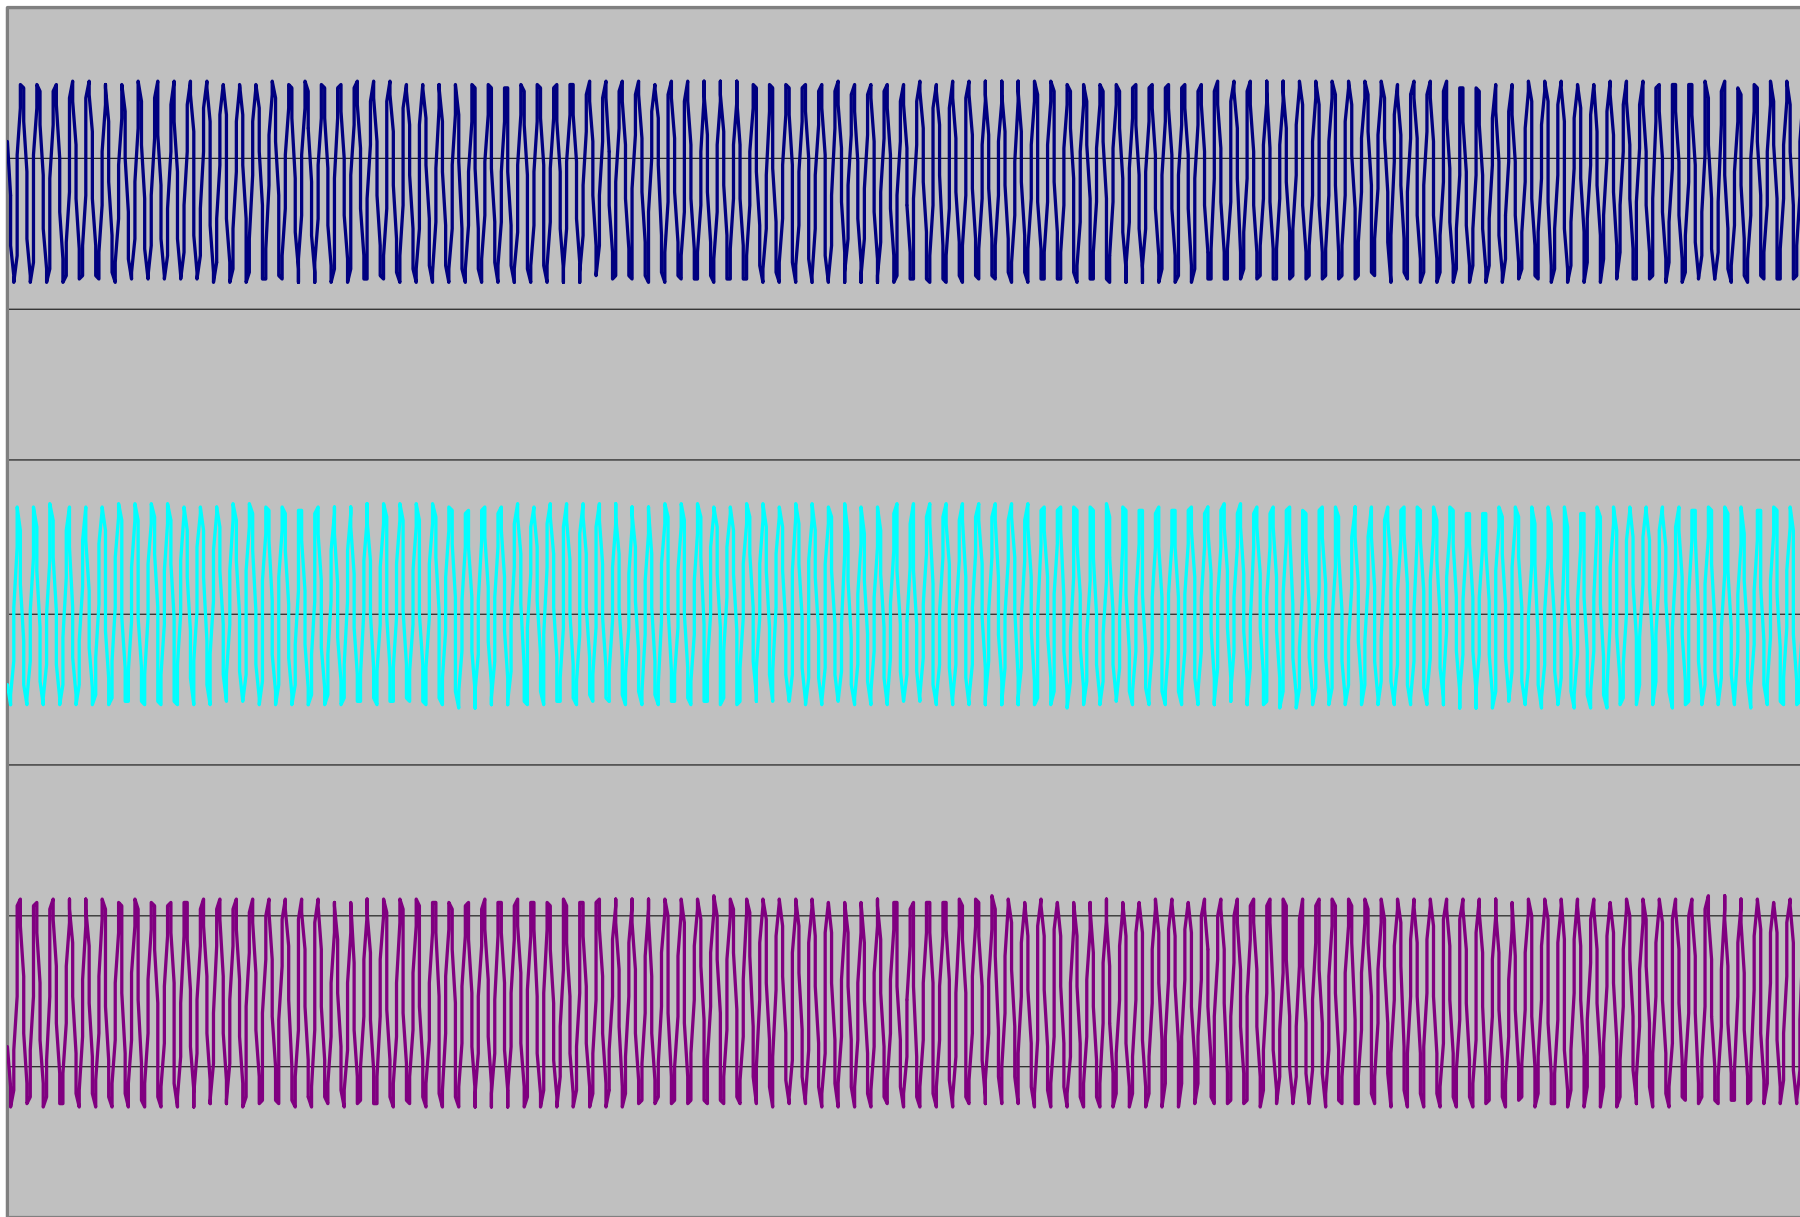

**Time**

Supplement: MOESM3 [file 9636136]
